# Supplementary material for: Akkermansia muciniphila and Lactobacillus plantarum ameliorate systemic lupus erythematosus by possibly regulating immune response and remodeling gut microbiota
Source: PubMed Central journal article supplement (PMC10449527; doi:10.1128/msphere.00070-23), 2023-06-27

A

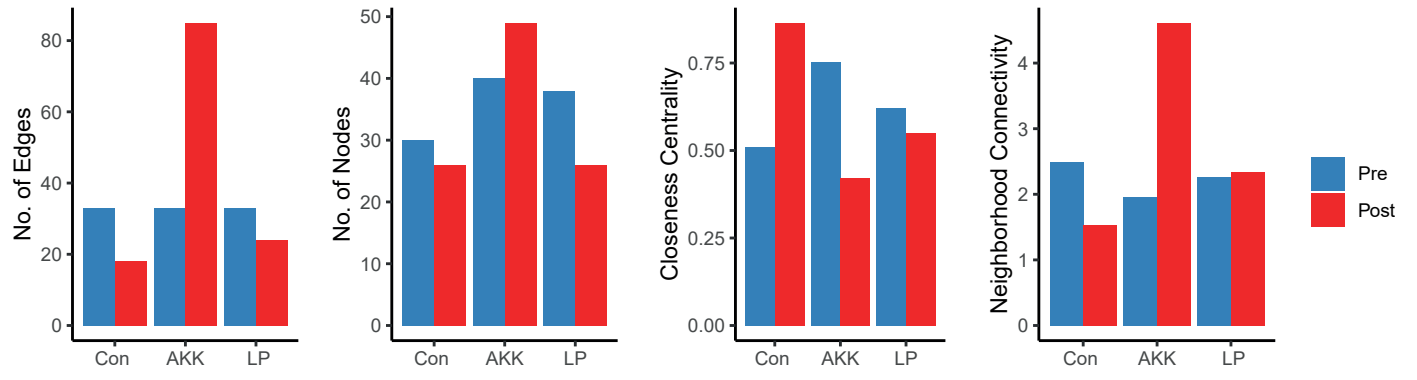

Supplement: msphere.00070-23-s0003.pdf [file msphere.00070-23-s0003.pdf]
